# Supplementary material for: Hierarchically porous nagelschmidtite bioceramic–silk scaffolds for bone tissue engineering
Source: Royal Society of Chemistry journal article supplement (doi:10.1039/c5tb00435g), 2015-01-01
Supplement: c5tb00435g1.pdf [file c5tb00435g1.pdf]

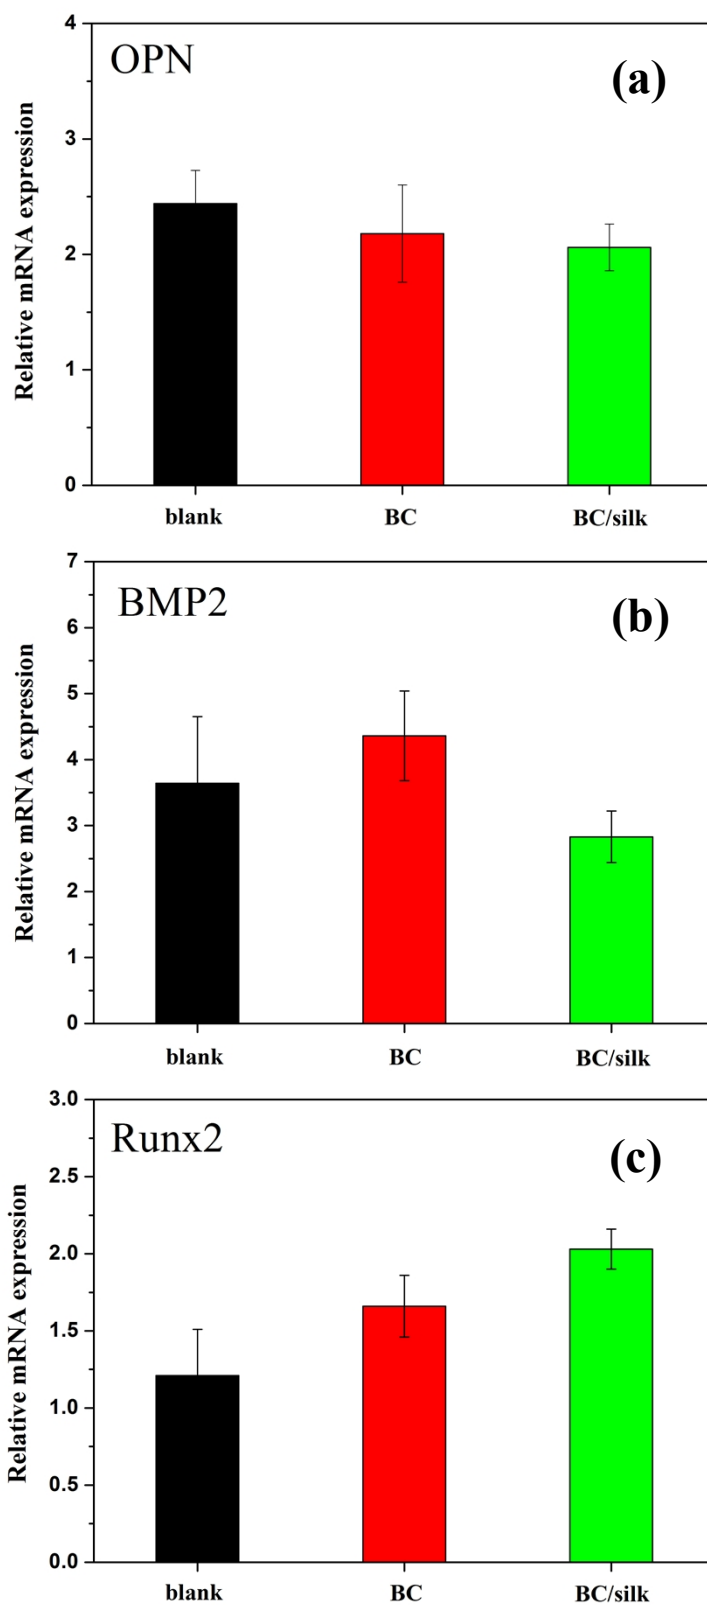

Supplement Figure 1. Bone-related gene expression of BMSCs in BC scaffolds and BC/silk(2.5%) scaffolds at day 14. (a) OPN, (b) BMP2 and (c) RUNX2.
